# Supplementary material
Source: PubMed Central journal article supplement (PMC3328301)

Type of file: figure

Label: S10

Filename: mc\_20528\_sm\_SupplFig10.tif

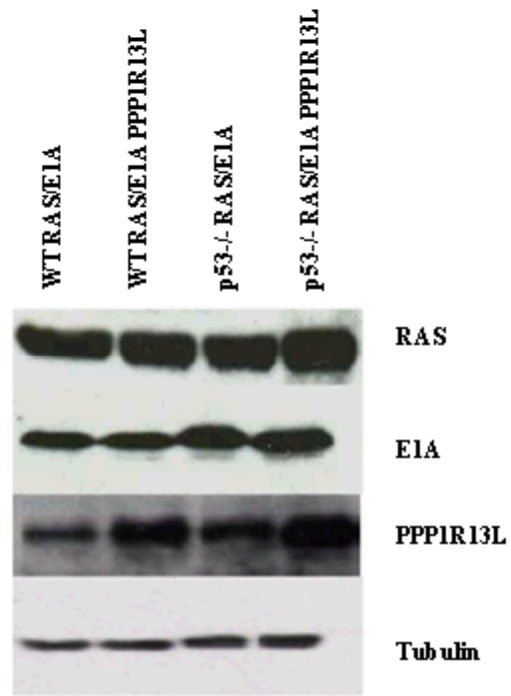

Type of file: figure

Label: S11

Filename: mc\_20528\_sm\_SupplFig11.tif

**p53<sup>-/-</sup> RAS/E1A**

**p53<sup>-/-</sup> RAS/E1A PPP1R13L**

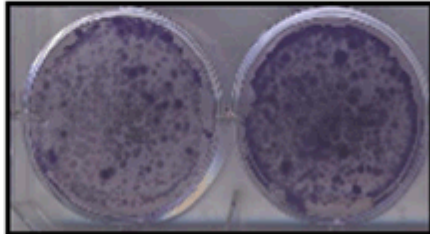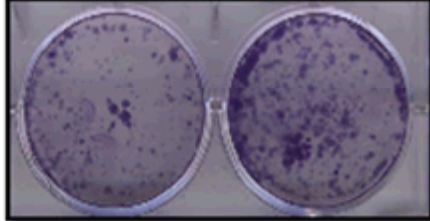

**WT RAS/E1A**

**WT RAS/E1A PPP1R13L**

Type of file: figure

Label: S12

Filename: mc\_20528\_sm\_SupplFig12.tif

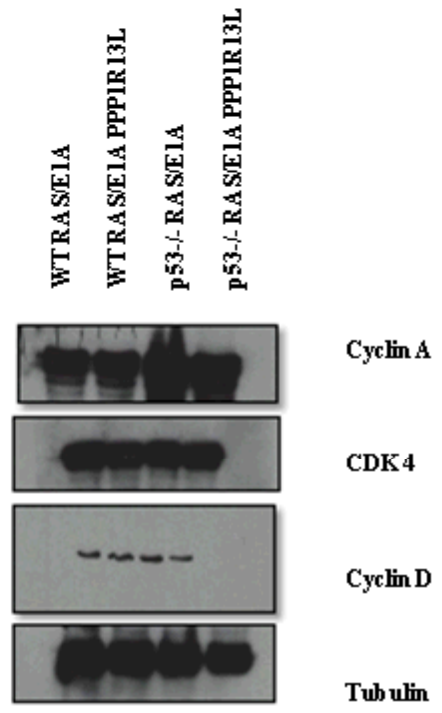

Type of file: figure

Label: S13

Filename: mc\_20528\_sm\_SupplFig13.tif

**a**

WT RAS/E1A

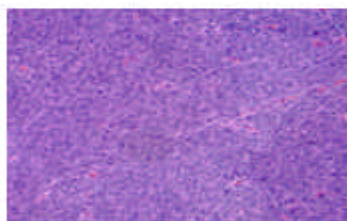

**p53<sup>-/-</sup> RAS/E1A**

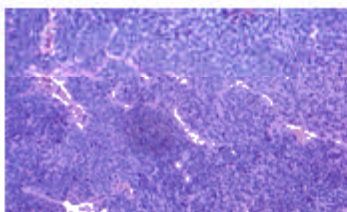

WT RAS/E1A PPP1R13L

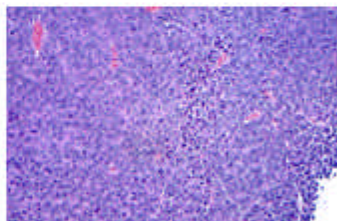

**p53<sup>-/-</sup> RAS/E1A PPP1R13L**

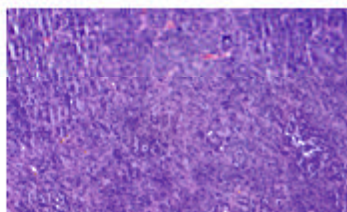

**b**

WT RAS/E1A

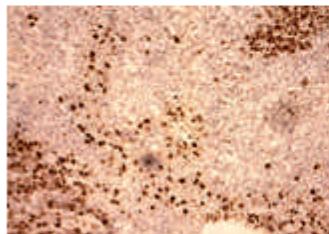

**p53<sup>-/-</sup> RAS/E1A**

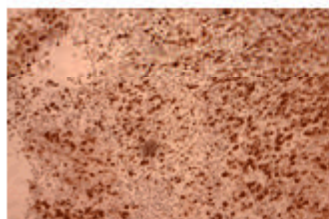

WT RAS/E1A PPP1R13L

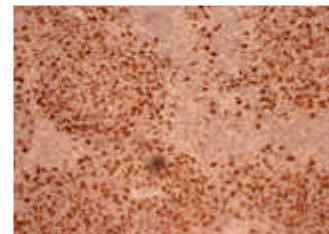

**p53<sup>-/-</sup> RAS/E1A PPP1R13L**

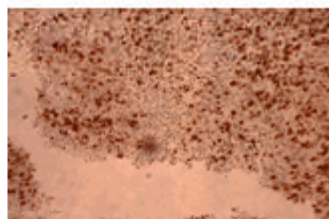



Type of file: figure

Label: S14

Filename: mc\_20528\_sm\_SupplFig14.tif

a Adriamycin

b Etoposide

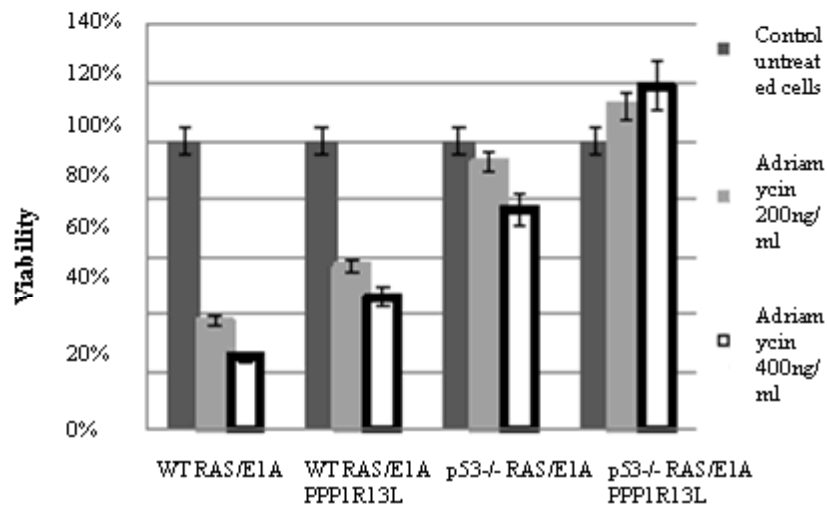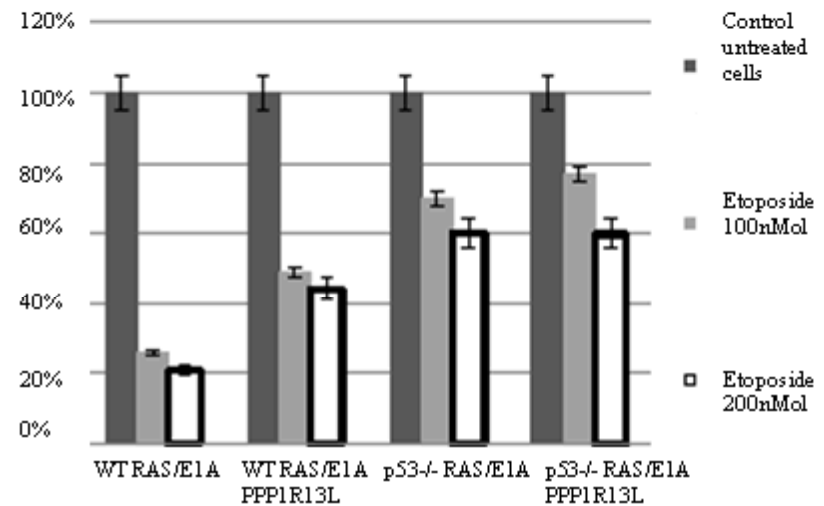

Type of file: figure

Label: S15

Filename: mc\_20528\_sm\_SupplFig15.tif

Caspase 3

DAPI

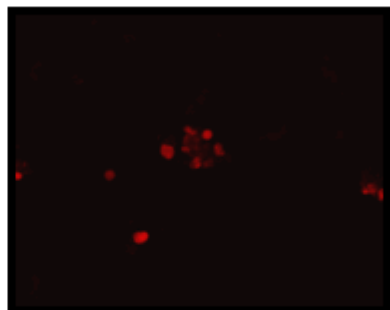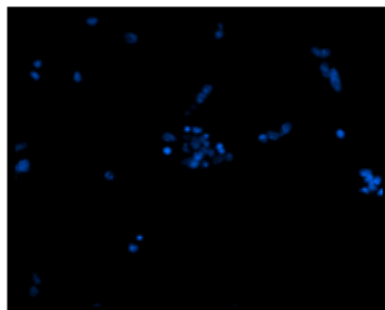

WT RAS/E1A

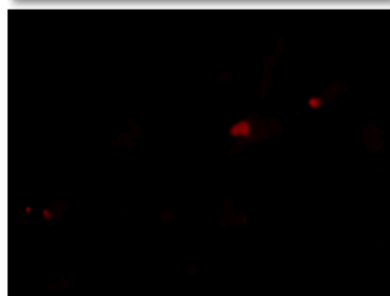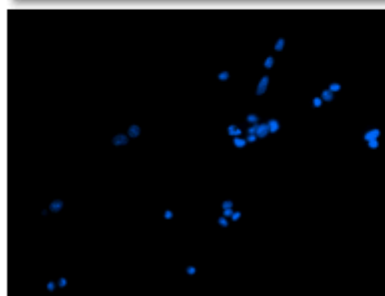

WT RAS/E1A PPP1R13L

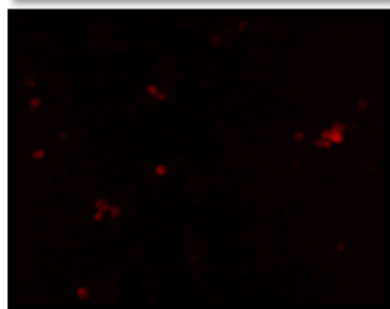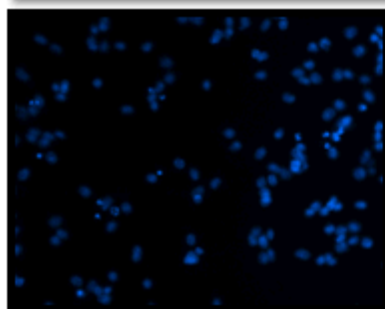

p53<sup>-/-</sup> RAS/E1A

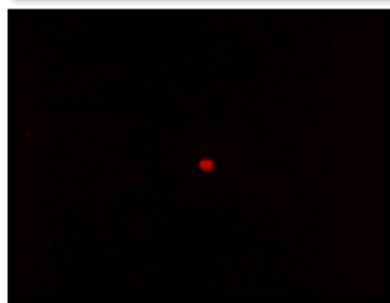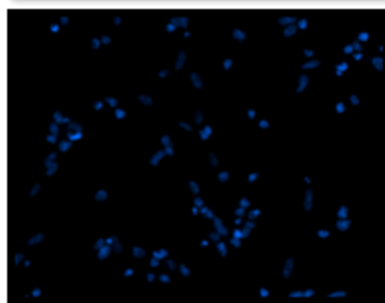

p53<sup>-/-</sup> RAS/E1A PPP1R13L

Type of file: figure

Label: S16

Filename: mc\_20528\_sm\_SupplFig16.tif

DAPI

BrdU

Merge

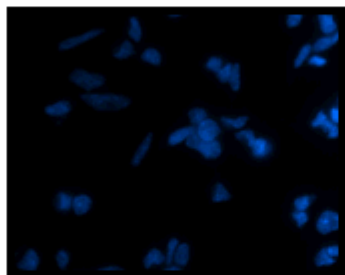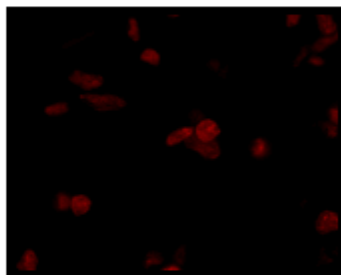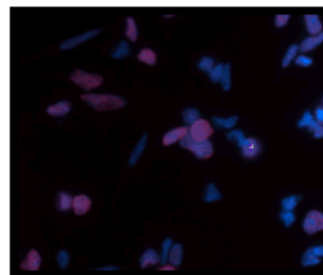

**WT RAS/E1A**

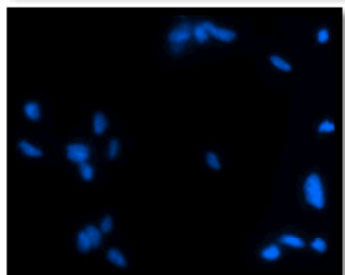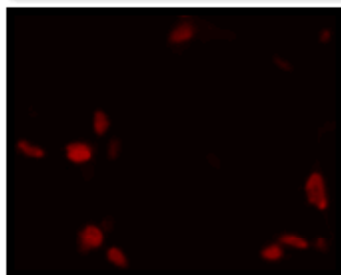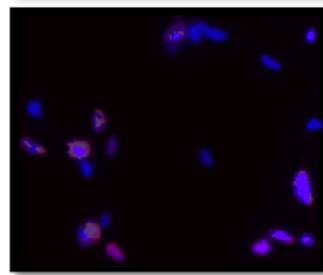

**WT RAS/E1A PPP1R13L**

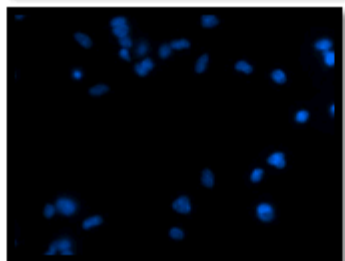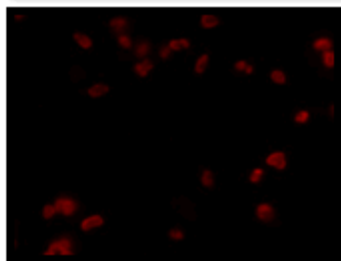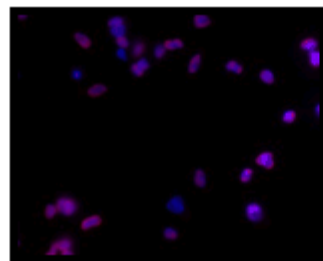

**p53<sup>-/-</sup> RAS/E1A**

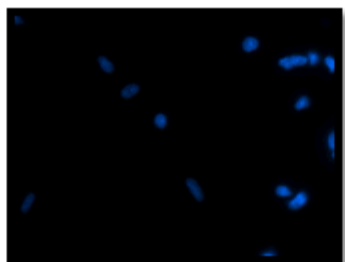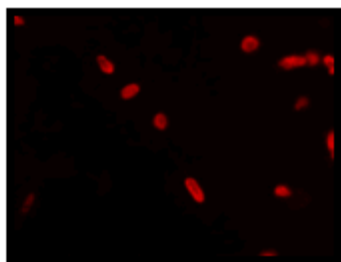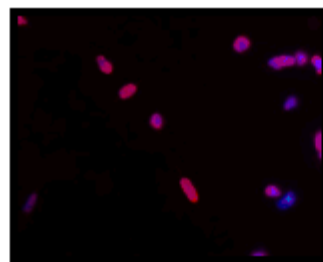

**p53<sup>-/-</sup> RAS/E1A PPP1R13L**

Type of file: figure

Label: S17

Filename: mc\_20528\_sm\_SupplFig17.tif

a

WT RAS/E1A

0h

24h

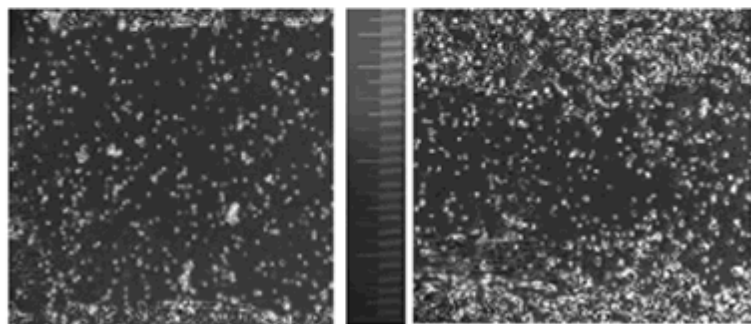

b

WT RAS/E1A PPP1R13L

0h

24h

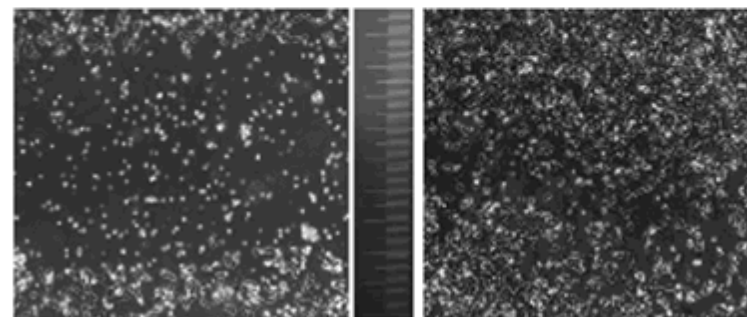

p53<sup>-/-</sup> RAS/E1A

0h

24h

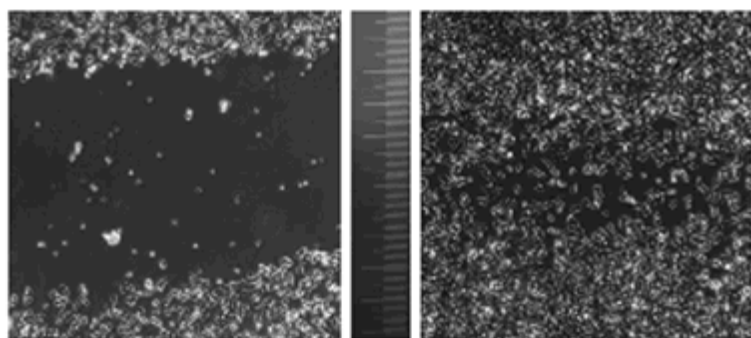

p53<sup>-/-</sup> RAS/E1A PPP1R13L

0h

24h

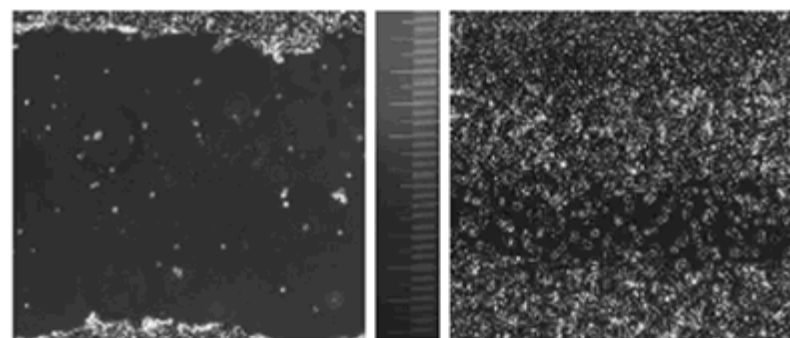

c

d

100  $\mu$ m.

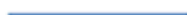

Supplement: NIHMS353851-supplement-01.pdf [file NIHMS353851-supplement-01.pdf]
